# Supplementary material for: Cystic Fibrosis Transmembrane Conductance Regulator Folding Mutations Reveal Differences in Corrector Efficacy Linked to Increases in Immature Cystic Fibrosis Transmembrane Conductance Regulator Expression
Source: PubMed Central journal article supplement (PMC8576290; doi:10.3389/fphys.2021.695767), 2021-10-26
Supplement: Table_1.pdf [file Table_1.pdf]

**Table 1.S: Analysis of CFTR Missense Mutations**

|                       | CFTR2 variant annotation<br>(as of 31 July 2020) | n alleles in<br>CFTR2 | Sweat chloride,<br>mEq/L <sup>a</sup> | % Patients who are PI <sup>a,b</sup> |
|-----------------------|--------------------------------------------------|-----------------------|---------------------------------------|--------------------------------------|
| Non-CF                | -                                                | -                     | Less than 30                          | Less than 1%                         |
| P67L                  | CF-causing                                       | 239                   | 60                                    | 33                                   |
| G85E                  | CF-causing                                       | 610                   | 100                                   | 86                                   |
| E92K                  | CF-causing                                       | 38                    | 89                                    | 54                                   |
| R117H;9T <sup>c</sup> | -                                                | -                     | -                                     | -                                    |
| R117H;7T              | Varying clinical consequences                    | 125                   | 43                                    | 15                                   |
| R117H;5T              | CF-causing                                       | 102                   | 74                                    | 31                                   |
| R334W                 | CF-causing                                       | 425                   | 99                                    | 40                                   |
| R347P                 | CF-causing                                       | 528                   | 100                                   | 67                                   |
| A455E                 | CF-causing                                       | 496                   | 84                                    | 34                                   |
| S492F                 | CF-causing                                       | 24                    | 79                                    | 48                                   |
| V520F                 | CF-causing                                       | 156                   | 105                                   | 96                                   |
| R560K                 | CF-causing                                       | 15                    | 110                                   | 100                                  |
| R560T                 | CF-causing                                       | 343                   | 103                                   | 98                                   |
| S549R                 | CF-causing                                       | 93                    | 105                                   | 98                                   |
| D614G                 | Varying clinical consequences                    | 17                    | 60                                    | 29                                   |
| L1065P                | CF-causing                                       | 43                    | 103                                   | 79                                   |
| R1066C                | CF-causing                                       | 220                   | 104                                   | 98                                   |
| L1077P                | CF-causing                                       | 96                    | 101                                   | 94                                   |
| M1101K                | CF-causing                                       | 238                   | 106                                   | 70                                   |
| N1303K                | CF-causing                                       | 2226                  | 105                                   | 98                                   |

<sup>a</sup>Clinical data shown from individuals in CFTR2 who have variant of interest and a PI-CF-causing variant

<sup>b</sup>PI; pancreatic insufficient

<sup>c</sup>Not annotated on cftr2.org
